# Supplementary material for: Objective monitoring of loneliness levels using smart devices: A multi-device approach for mental health applications
Source: PubMed Central journal article supplement (PMC11189241; doi:10.1371/journal.pone.0298949), 2024-06-20
Supplement: pone.0298949.s001.pdf [file pone.0298949.s001.pdf]

# 1 S Appendix

**Table S 1.** List of features extracted from smart ring

| Category                                                                                             | Feature                                                                                                      |
|------------------------------------------------------------------------------------------------------|--------------------------------------------------------------------------------------------------------------|
| Activity                                                                                             | Average activity level during the whole day.                                                                 |
|                                                                                                      | Number of kilocalories one spent in a day based on the amount of physical activity                           |
|                                                                                                      | The total number of kilocalories one consumed in a day                                                       |
|                                                                                                      | Every 5 minutes a character is shown to indicate the level of intensity of an activity.                      |
|                                                                                                      | How many minutes of high intensity activity was performed in a day.                                          |
|                                                                                                      | Number of minutes where one is not doing anything in a day.                                                  |
|                                                                                                      | Number of minutes where one is doing low intensity activity in a day.                                        |
|                                                                                                      | Number of minutes where one is doing medium intensity activity in a day.                                     |
|                                                                                                      | The average amount of energy it costs to complete a task for each minute of the span of one activity period. |
|                                                                                                      | Total number of minutes of when the user was not wearing the ring during the day                             |
|                                                                                                      | Total number of minutes spent sleeping during a day.                                                         |
|                                                                                                      | Number of steps taken during the day                                                                         |
|                                                                                                      | Sleep Features                                                                                               |
| average beats per minute                                                                             |                                                                                                              |
| percentage of sleep period spent asleep                                                              |                                                                                                              |
| heart rate at 5 minutes each sleep period                                                            |                                                                                                              |
| average heart rate during the sleep period                                                           |                                                                                                              |
| lowest heart rate during sleep period (resting heart rate)                                           |                                                                                                              |
| The time it takes a person to fall asleep after turning the lights out                               |                                                                                                              |
| Percentage of sleep time when the user was moving                                                    |                                                                                                              |
| Measure of the beat-to-beat differences in heart rate                                                |                                                                                                              |
| Measures the beat-to-beat differences in heart rate in the first five minutes of the sleep period    |                                                                                                              |
| The measure of the change in your body temperature while you sleep                                   |                                                                                                              |
| The difference between your body's core temperature and the temperature of your sleeping environment |                                                                                                              |
| Represents the amount of time a person spends asleep during a given period of time                   |                                                                                                              |

**Table S 2.** List of features extracted from smart watch

| <b>ID</b>    | <b>Feature</b>                                                                                                                                                                                              |
|--------------|-------------------------------------------------------------------------------------------------------------------------------------------------------------------------------------------------------------|
| HRV_MeanNN   | The mean of the RR intervals.                                                                                                                                                                               |
| HRV_SDNN     | The standard deviation of the RR intervals.                                                                                                                                                                 |
| HRV_SDANN1   | The standard deviation of average RR intervals extracted from 1-minute segments of time series data                                                                                                         |
| HRV_SDNNI1   | The mean of the standard deviations of RR intervals extracted from 1-minute segments of time series data                                                                                                    |
| HRV_RMSSD    | The square root of the mean of the squared successive differences between adjacent RR intervals.                                                                                                            |
| HRV_SSD      | The standard deviation of the successive differences between RR intervals.                                                                                                                                  |
| HRV_CVNN     | The standard deviation of the RR intervals (SDNN) divided by the mean of the RR intervals (MeanNN).                                                                                                         |
| HRV_CVSD     | The root mean square of successive differences (RMSSD) divided by the mean of the RR intervals (MeanNN).                                                                                                    |
| HRV_MedianNN | The median of the RR intervals.                                                                                                                                                                             |
| HRV_MadNN    | The median absolute deviation of the RR intervals.                                                                                                                                                          |
| HRV_MCVNN    | The median absolute deviation of the RR intervals (MadNN) divided by the median of the RR intervals (MedianNN).                                                                                             |
| HRV_IQRNN    | The interquartile range (IQR) of the RR intervals.                                                                                                                                                          |
| HRV_PNN50    | The proportion of RR intervals greater than 50ms, out of the total number of RR intervals.                                                                                                                  |
| HRV_PNN20    | The proportion of RR intervals greater than 20ms, out of the total number of RR intervals.                                                                                                                  |
| HRV_HTI      | The HRV triangular index, measuring the total number of RR intervals divided by the height of the RR intervals histogram.                                                                                   |
| HRV_TINN     | The baseline width of the RR intervals distribution obtained by triangular interpolation, where the error of least squares determines the triangle. It is an approximation of the RR interval distribution. |
| HRV_LF       | The spectral power of low frequencies (0.04 to 0.15 Hz).                                                                                                                                                    |
| HRV_HF       | The spectral power of high frequencies (0.15 to 0.4 Hz).                                                                                                                                                    |
| HRV_VHF      | The spectral power of very high frequencies ( 0.4 to .5 Hz).                                                                                                                                                |
| HRV_LFHF     | The ratio obtained by dividing the low frequency power by the high frequency power.                                                                                                                         |
| HRV_LFn      | The normalized low frequency, obtained by dividing the low frequency power by the total power.                                                                                                              |
| HRV_HFn      | The normalized high frequency, obtained by dividing the low frequency power by the total power.                                                                                                             |
| HRV_LnHF     | The log transformed HF.                                                                                                                                                                                     |
| HRV_SD1      | Standard deviation perpendicular to the line of identity. It is an index of short-term RR interval fluctuation                                                                                              |
| HRV_SD2      | Standard deviation along the identity line. Index of long-term HRV changes.                                                                                                                                 |
| HRV_SD1SD2   | Ratio of SD1 to SD2. Describes the ratio of short term to long term variations in HRV.                                                                                                                      |
| HRV_S        | Area of ellipse described by SD1 and SD2 ( $\pi * SD1 * SD2$ )                                                                                                                                              |
| HR           | Heart rate                                                                                                                                                                                                  |

**Table S 3.** List of features extracted from smartphone

| Category              | Feature                                                          |
|-----------------------|------------------------------------------------------------------|
| Call                  | Outgoing call duration                                           |
|                       | Income call counts                                               |
|                       | Outgoing call counts                                             |
|                       | Missedcall counts                                                |
|                       | Voicemail counts                                                 |
| Notification          | Number of notifications from applications type: Productivity     |
|                       | Number of notifications from applications type: Photography      |
|                       | Number of notifications from applications type: Communication    |
|                       | Number of notifications from applications type: Lifestyle        |
|                       | Number of notifications from applications type: Social           |
|                       | Number of notifications from applications type: Shopping         |
|                       | Number of notifications from applications type: Health & Fitness |
|                       | Number of notifications from applications type: Entertainment    |
|                       | Number of notifications from applications type: Music & Audio    |
| Messages              | Number of received messages                                      |
|                       | Number of sent messages                                          |
| Screen                | Number of screen off                                             |
|                       | Number of screen on                                              |
|                       | Number of screen locks                                           |
|                       | Number of screen unlocks                                         |
| Location (GPS)        | Variance of latitude                                             |
|                       | Variance of speed                                                |
|                       | Mean of speed                                                    |
|                       | Number of places                                                 |
|                       | Home duration                                                    |
|                       | Outdoor duration                                                 |
|                       | Mean of outdoor duration                                         |
|                       | Standard deviation of outdoor duration                           |
|                       | Type of the place with longest duration other than home          |
| Total travel distance |                                                                  |
| Battery               | Number of battery charger plugins                                |
